# Supplementary material for: Ablating VHL in rod photoreceptors modulates RPE glycolysis and improves preclinical model of retinitis pigmentosa
Source: JCI journal article supplement (doi:10.1172/jci185796), 2025-02-11

Uncropped Blots for Supplemental Figure 1B

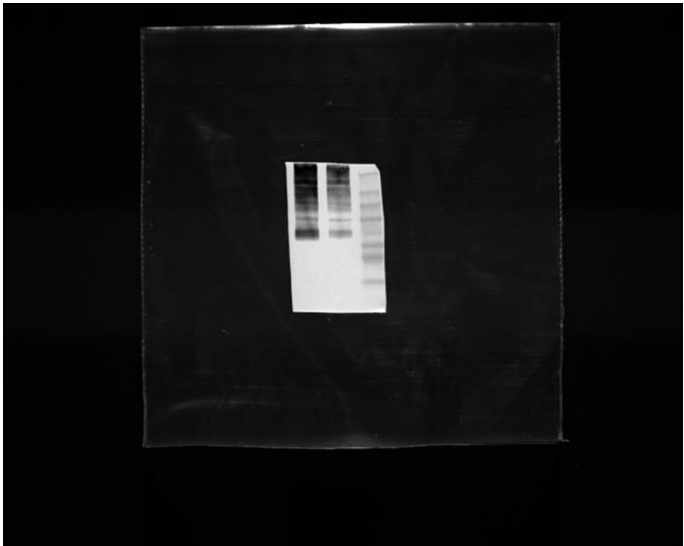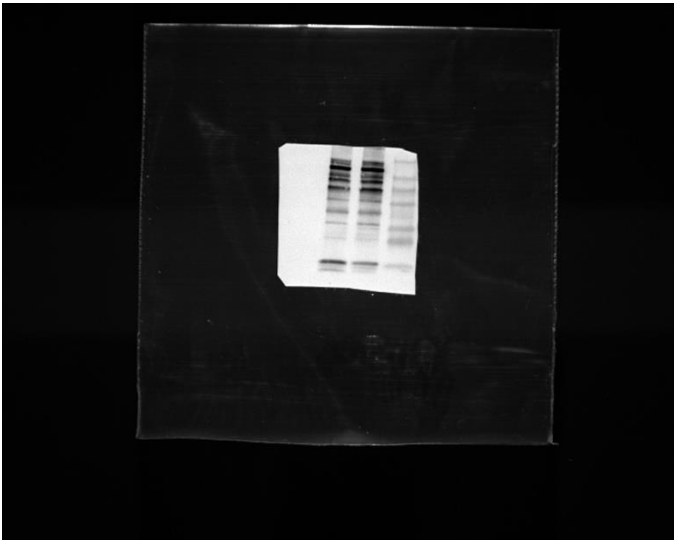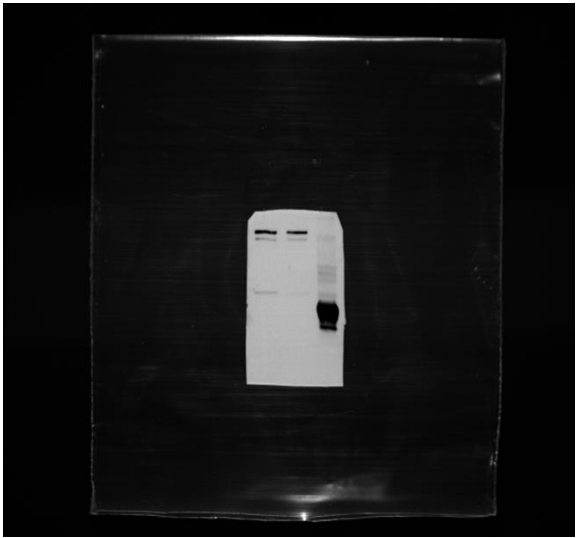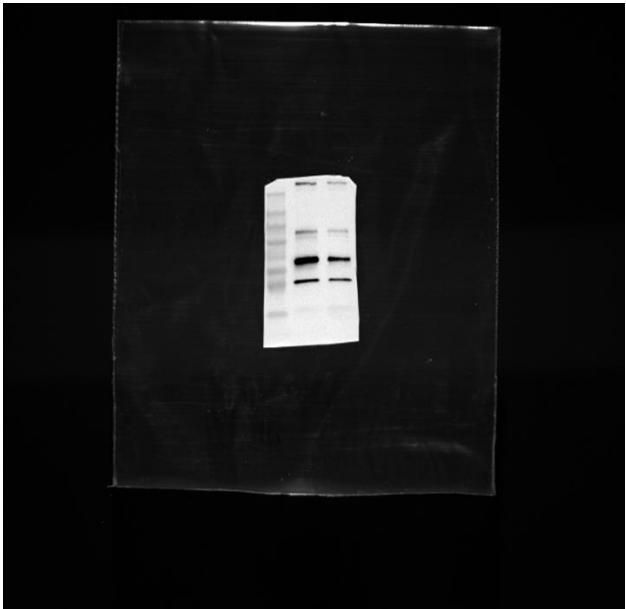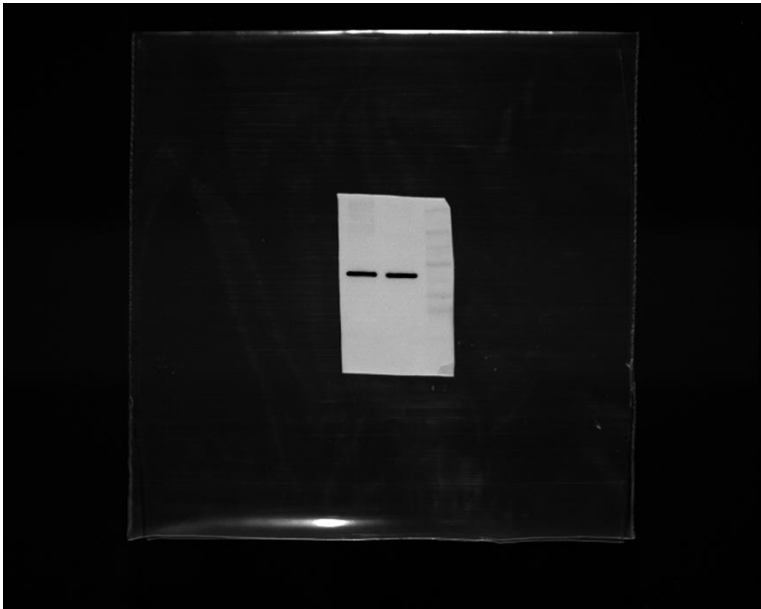

Uncropped Blots for Supplemental Figure 6B

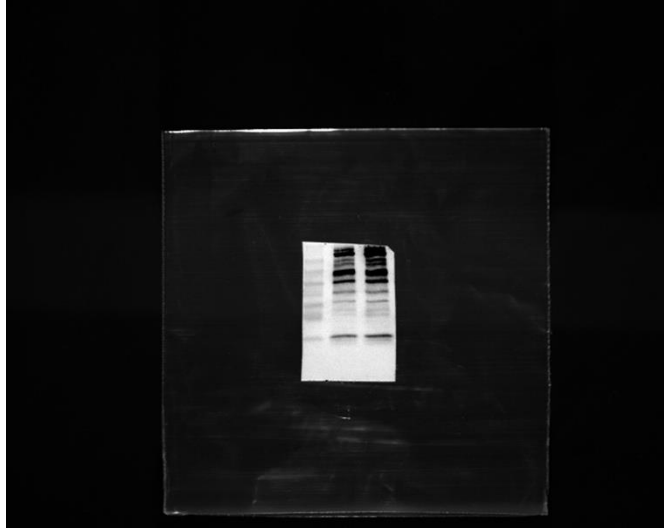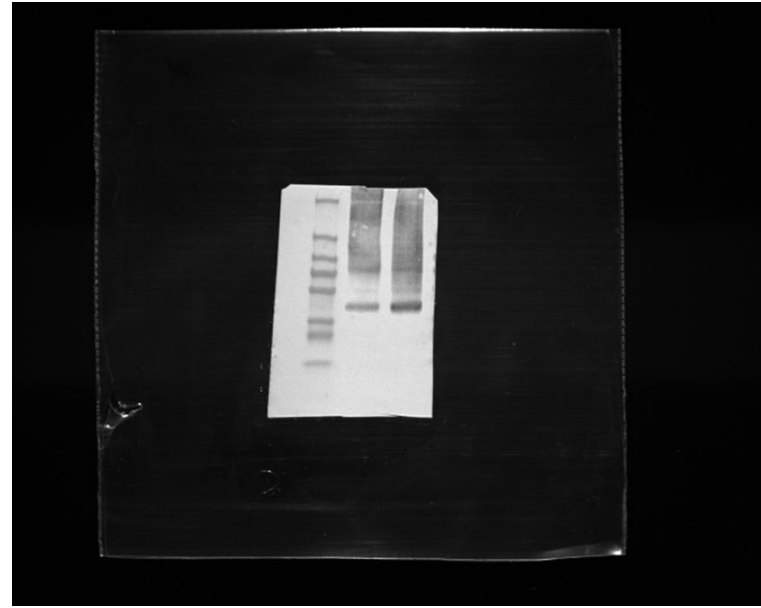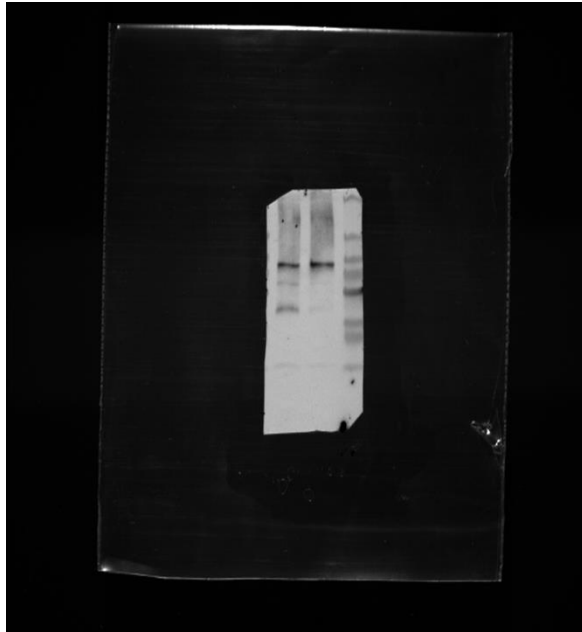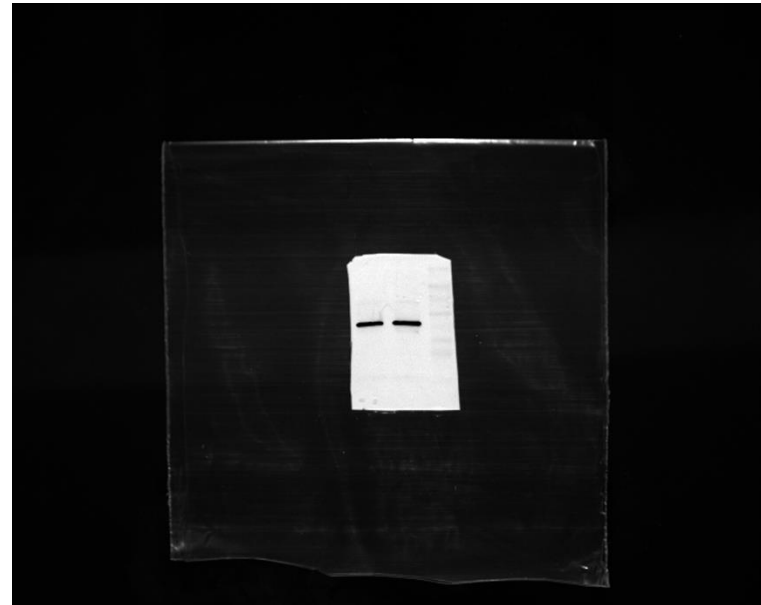

Supplement: sd2 [file 2]
